# Supplementary material for: Individual Proportion Loss of Functional Connectivity Strength: A Novel Individual Functional Connectivity Biomarker for Subjective Cognitive Decline Populations
Source: MDPI journal article supplement (doi:10.3390/biology12040564), 2023-04-07
Supplement: s1 [file s1]

**Supplementary Table S1.** The ROI-based brain regions with significant differences.

| The ROIs with significant differences(AAL template) |                           |                     |                              |                           |                     |
|-----------------------------------------------------|---------------------------|---------------------|------------------------------|---------------------------|---------------------|
| Cohort 1 with PET (NC VS SCD)                       |                           |                     | Cohort 2 (NC VS SCD)         |                           |                     |
| Regions                                             | Anatomical classification | P value (corrected) | Regions                      | Anatomical classification | P value (corrected) |
| Superior frontal gyrus, medial orbital(left)        | Prefrontal                | 0.041               | Middle temporal gyrus(left)  | Temporal                  | <0.001              |
| Middle temporal gyrus(left)                         | Temporal                  | 0.021               | Middle temporal gyrus(right) | Temporal                  | <0.001              |
| Cohort 1 without PET (NC VS SCD)                    |                           |                     |                              |                           |                     |
| Middle frontal gyrus(left)                          | Prefrontal                | 0.026               |                              |                           |                     |
| Middle frontal gyrus(right)                         | Prefrontal                | 0.026               |                              |                           |                     |
| Calcarine fissure and surrounding cortex(right)     | Occipital                 | 0.031               |                              |                           |                     |
| Superior occipital gyrus(left)                      | Occipital                 | 0.035               |                              |                           |                     |
| Middle temporal gyrus(left)                         | Temporal                  | 0.026               |                              |                           |                     |

Abbreviations: SCD, subjective cognitive decline; NC, normal control; ROI, region of interest; AAL, anatomical automatic labeling.

**Supplementary Table S2.** Results of causal analysis.

|         | SCD 1 | MCI 1 | AD 1  | SCD 2 | MCI 2 | AD 2  |
|---------|-------|-------|-------|-------|-------|-------|
| P value | 0.845 | 0.878 | 0.942 | 0.782 | 0.474 | 0.101 |

Abbreviations: SCD, subjective cognitive decline; MCI, mild cognitive impairment; AD, Alzheimer's disease.

**Supplementary Table S3.** Correlation analysis of SUVR and proportional loss.

| The ROIs with significant differences(AAL template) |                           |        |         |
|-----------------------------------------------------|---------------------------|--------|---------|
| Cohort 1 with PET (NC VS SCD)                       |                           |        |         |
| Regions                                             | Anatomical classification | R      | P value |
| Whole brain                                         |                           | -0.176 | 0.119   |
| Hippocampus_L                                       | Temporal                  | -0.259 | 0.020   |
| Hippocampus_R                                       | Temporal                  | -0.281 | 0.012   |
| ParaHippocampal_L                                   | Temporal                  | -0.165 | 0.143   |
| ParaHippocampal_R                                   | Temporal                  | -0.227 | 0.043   |
| Amygdala_L                                          | Temporal                  | 0.142  | 0.207   |
| Amygdala_R                                          | Temporal                  | -0.202 | 0.073   |
| Fusiform_L                                          | Temporal                  | -0.329 | 0.003   |
| Fusiform_R                                          | Temporal                  | -0.299 | 0.007   |
| Heschl_L                                            | Temporal                  | -0.173 | 0.126   |
| Heschl_R                                            | Temporal                  | -0.216 | 0.054   |
| Temporal_Sup_L                                      | Temporal                  | -0.201 | 0.074   |
| Temporal_Sup_R                                      | Temporal                  | -0.196 | 0.082   |
| Temporal_Pole_Sup_L                                 | Temporal                  | -0.072 | 0.526   |
| Temporal_Pole_Sup_R                                 | Temporal                  | 0.209  | 0.063   |
| Temporal_Mid_L                                      | Temporal                  | -0.245 | 0.029   |
| Temporal_Mid_R                                      | Temporal                  | -0.200 | 0.075   |
| Temporal_Pole_Mid_L                                 | Temporal                  | 0.059  | 0.606   |
| Temporal_Pole_Mid_R                                 | Temporal                  | 0.053  | 0.640   |
| Temporal_Inf_L                                      | Temporal                  | -0.217 | 0.053   |
| Temporal_Inf_R                                      | Temporal                  | -0.123 | 0.275   |

Abbreviations: SCD, subjective cognitive decline; NC, normal control; ROI, region of interest; AAL, anatomical automatic labeling.

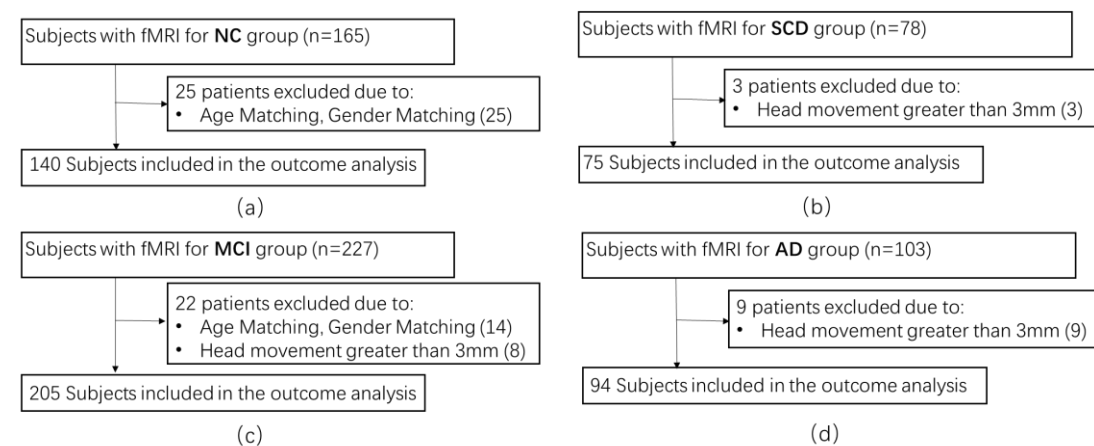

**Supplementary Figure S1.** Workflow show ADNI cohort participant selection details in (a) NC, (b) SCD, (c) MCI and (d) AD. Abbreviations: NC, normal control; SCD, subjective cognitive decline; MCI, mild cognitive impairment; AD, Alzheimer's disease.
